# Supplementary material for: Hollow periodic mesoporous organosilicas for highly efficient HIFU-based synergistic therapy
Source: Royal Society of Chemistry journal article supplement (doi:10.1039/c3ra47654e), 2014-01-01
Supplement: c3ra47654e1.pdf [file c3ra47654e1.pdf]

Supporting information for *RSC Advances*

**Hollow Periodic Mesoporous Organosilicas for Highly Efficient  
HIFU-Based Synergistic Therapy**

Xiaoqin Qian,<sup>a</sup> Wenping Wang<sup>\*a</sup> Wentao Kong<sup>a</sup> and Yu Chen<sup>\*b</sup>

<sup>a</sup> The Department of Ultrasound, Zhongshan Hospital, Fudan University, Shanghai 200032, P.R. China, Email: [puguang61@126.com](mailto:puguang61@126.com), Tel: +86-13681975670, Fax: +86-21-64220319.

<sup>b</sup> State Key Laboratory of High Performance Ceramic and Superfine Microstructures, Shanghai Institute of Ceramics, Chinese Academy of Science, Shanghai 200050, P.R. China, Email: [chenyu@mail.sic.ac.cn](mailto:chenyu@mail.sic.ac.cn) Tel: +86-21-52412708; Fax: +86-21-52413122.

*Supplementary Figures*

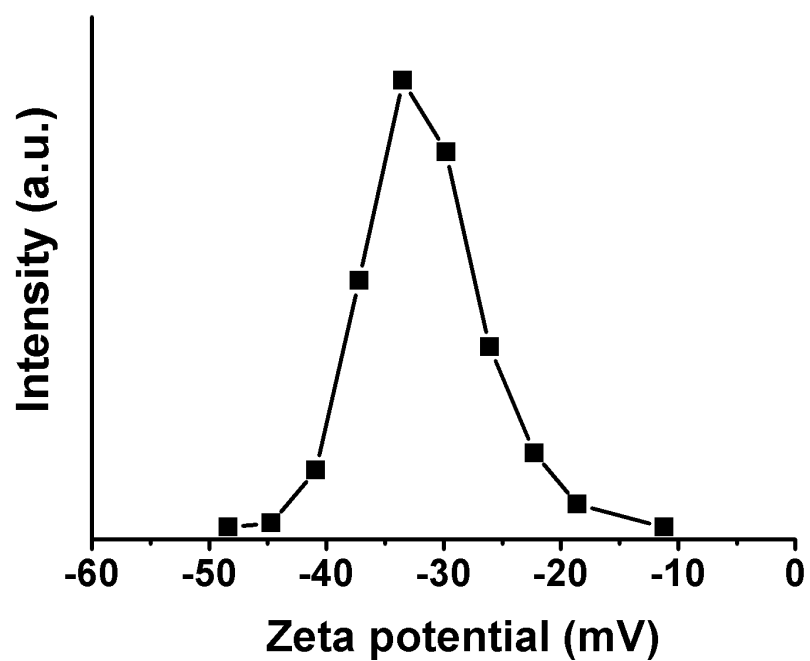

*Figure S1.* Zeta potential of HPMOs. The Zeta potential of HPMOs is -33.5 mV.

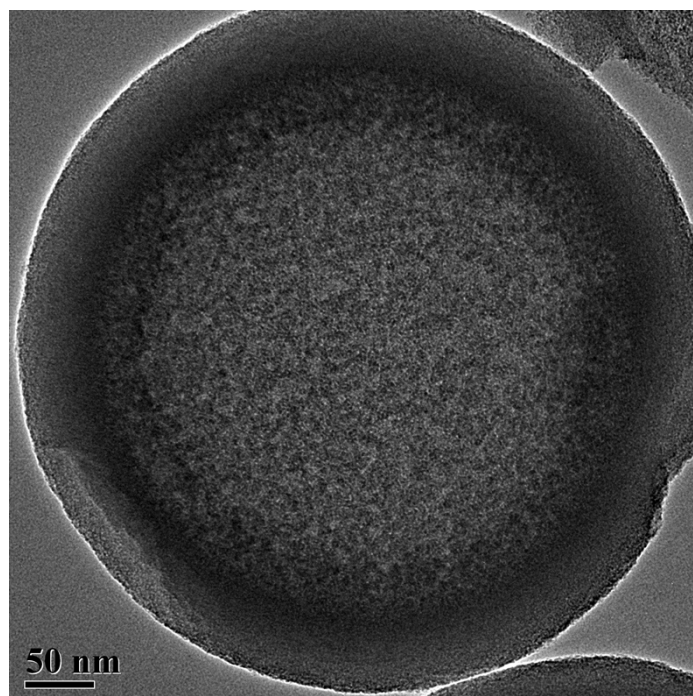

*Figure S2.* TEM image of HPMOs with high magnification.

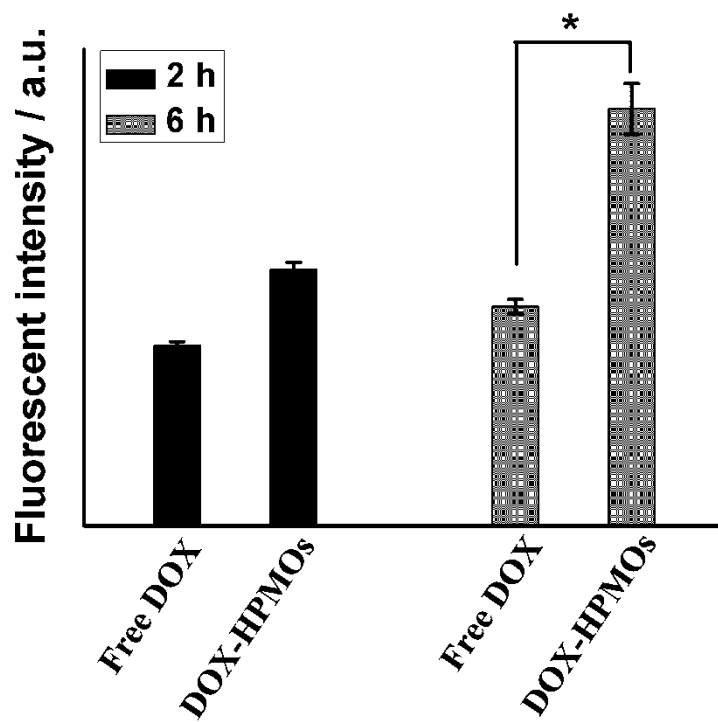

**Figure S3.** Flow cytometry results of quantitative fluorescent intensities of HeLa cells after the co-incubation with free DOX and DOX-loaded HPMOs for 2 h and 6 h (\*P < 0.05).
